# Supplementary material
Source: publisher figshare collection journal article supplement (https://karger.figshare.com/ndownloader/files/14530583)
Supplement: Supplementary file 1 [file 14530583]

Supplemental Table. Algorithms’ parameters. This table illustrates parameter details of each algorithm.

| Algorithms | Parameters |
| --- | --- |
| Decision Tree | {'max_depth': 2, 'max_leaf_nodes': 4, 'min_samples_leaf': 60} |
| Random Forest | {'max_depth': 11, 'max_leaf_nodes': 13, 'min_samples_leaf': 70} |
| Logistic regression | default |
| Naïve Bayes | default |
| Gradient Boosting Decision Tree | GradientBoostingClassifier(criterion='friedman_mse', init=None, learning_rate=0.2, loss='deviance', max_depth=11, max_features=3, max_leaf_nodes=None, min_impurity_split=1e-07, min_samples_leaf=26, min_samples_split=4, min_weight_fraction_leaf=0.0, n_estimators=110, presort='auto', random_state=None, subsample=0.7, verbose=0, warm_start=False) |
| Adaptive Boost | AdaBoostClassifier(algorithm='SAMME.R', base_estimator=DecisionTreeClassifier(class_weight=None, criterion='gini', max_depth=5, max_features=4, max_leaf_nodes=None, min_impurity_split=1e-07, min_samples_leaf=4, min_samples_split=10, min_weight_fraction_leaf=0.0, presort=False, random_state=None, splitter='best'), learning_rate=0.2, n_estimators=124, random_state=None) |
| Extreme Gradient Boost | {'max_depth': 2, 'min_child_weight': 20} |
